# Supplementary material
Source: Springer Nature journal article supplement (https://www.springermedizin.de/resource/supplementary/12874_2009_421_MOESM4_ESM.pdf/9432058)

HI Protection curve

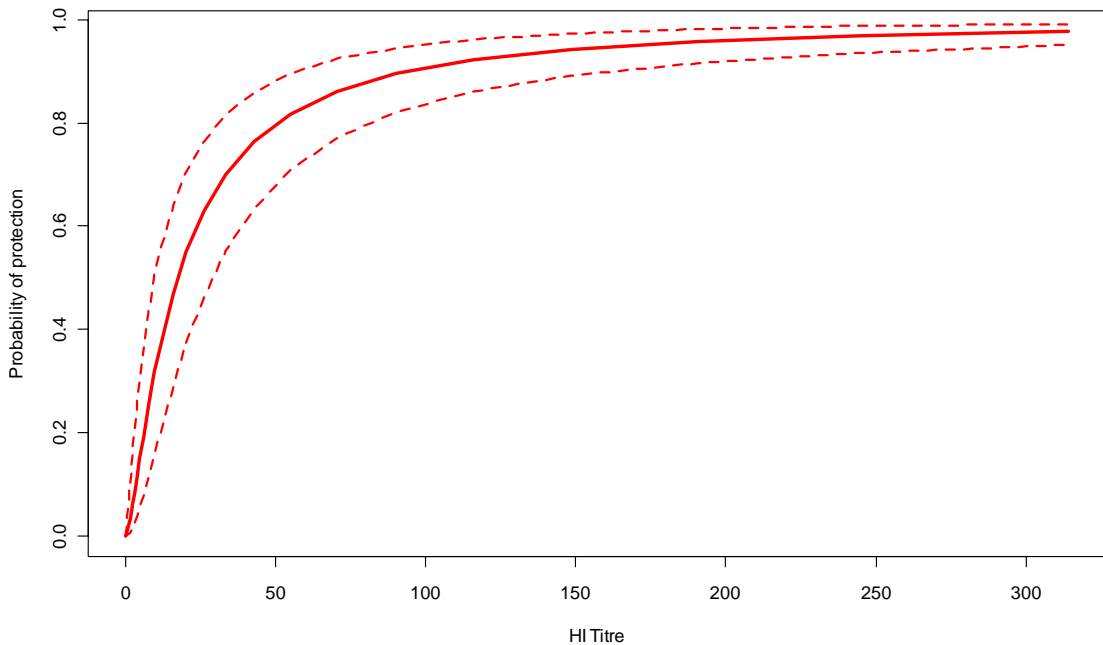

Supplement: MOESM4 [file 9432058]
